# Supplementary material for: Approach to the “Missing” Diarylsilylene: Formation, Characterization, and Intramolecular C−H Bond Activation of Blue Diarylsilylenes Having Bulky Rind Groups
Source: Preprints.org preprint supplement (doi:10.20944/preprints202403.0372.v1), 2024-03-06

```
R(reflections)= 0.0455( 9996)      wR2(reflections)=
S = 1.048                        0.1147( 12940)
Npar= 563
```

---

The following ALERTS were generated. Each ALERT has the format

**test-name\_ALERT\_alert-type\_alert-level.**

Click on the hyperlinks for more details of the test.

---

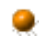

#### Alert level B

PLAT420\_ALERT\_2\_B D-H Bond Without Acceptor O1A --H1A . Please Check

**Author Response: The O-H groups are isolated from other electronegative atoms in the crystal structure.**

---

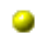

#### Alert level C

PLAT220\_ALERT\_2\_C NonSolvent Resd 1 C Ueq(max)/Ueq(min) Range 3.2 Ratio  
PLAT420\_ALERT\_2\_C D-H Bond Without Acceptor Si1 --H2A . Please Check

**Author Response: The O-H groups are isolated from other electronegative atoms in the crystal structure.**

---

PLAT906\_ALERT\_3\_C Large K Value in the Analysis of Variance ..... 3.340 Check

---

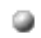

#### Alert level G

PLAT002\_ALERT\_2\_G Number of Distance or Angle Restraints on AtSite 7 Note  
PLAT171\_ALERT\_4\_G The CIF-Embedded .res File Contains EADP Records 1 Report  
PLAT172\_ALERT\_4\_G The CIF-Embedded .res File Contains DFIX Records 1 Report  
PLAT176\_ALERT\_4\_G The CIF-Embedded .res File Contains SADI Records 1 Report  
PLAT178\_ALERT\_4\_G The CIF-Embedded .res File Contains SIMU Records 1 Report  
PLAT191\_ALERT\_3\_G A Non-default SADI Restraint Value has been used 0.0020 Report  
PLAT301\_ALERT\_3\_G Main Residue Disorder ..... (Resd 1) 2% Note  
PLAT414\_ALERT\_2\_G Short Intra D-H..H-X H1A ..H44C . 2.00 Ang.  
x,y,z = 1\_555 Check  
PLAT414\_ALERT\_2\_G Short Intra D-H..H-X H2A ..H53A . 1.97 Ang.  
x,y,z = 1\_555 Check  
PLAT414\_ALERT\_2\_G Short Intra D-H..H-X H14B ..H1B . 2.13 Ang.  
x,y,z = 1\_555 Check  
PLAT414\_ALERT\_2\_G Short Intra D-H..H-X H15A ..H2B . 2.01 Ang.  
x,y,z = 1\_555 Check  
PLAT779\_ALERT\_4\_G Suspect or Irrelevant (Bond) Angle(s) in CIF ... 13.80 Deg.  
O1B -Si1 -H2A 1\_555 1\_555 1\_555 ..... # 7 Check  
PLAT779\_ALERT\_4\_G Suspect or Irrelevant (Bond) Angle(s) in CIF ... 16.20 Deg.  
O1A -Si1 -H2B 1\_555 1\_555 1\_555 ..... # 10 Check  
PLAT789\_ALERT\_4\_G Atoms with Negative \_atom\_site\_disorder\_group # 2 Check  
PLAT822\_ALERT\_4\_G CIF-embedded .res Contains Negative PART Numbers 1 Check  
PLAT860\_ALERT\_3\_G Number of Least-Squares Restraints ..... 3 Note  
PLAT910\_ALERT\_3\_G Missing # of FCF Reflection(s) Below Theta(Min). 2 Note  
1 0 0, 0 1 1,  
PLAT912\_ALERT\_4\_G Missing # of FCF Reflections Above STh/L= 0.600 511 Note  
PLAT933\_ALERT\_2\_G Number of HKL-OMIT Records in Embedded .res File 1 Note  
1 0 0,  
PLAT969\_ALERT\_5\_G The 'Henn et al.' R-Factor-gap value ..... 2.35 Note

---

0 **ALERT level A** = Most likely a serious problem - resolve or explain  
1 **ALERT level B** = A potentially serious problem, consider carefully  
3 **ALERT level C** = Check. Ensure it is not caused by an omission or oversight  
21 **ALERT level G** = General information/check it is not something unexpected

0 ALERT type 1 CIF construction/syntax error, inconsistent or missing data  
10 ALERT type 2 Indicator that the structure model may be wrong or deficient  
5 ALERT type 3 Indicator that the structure quality may be low  
9 ALERT type 4 Improvement, methodology, query or suggestion  
1 ALERT type 5 Informative message, check

---

It is advisable to attempt to resolve as many as possible of the alerts in all categories. Often the minor alerts point to easily fixed oversights, errors and omissions in your CIF or refinement strategy, so attention to these fine details can be worthwhile. In order to resolve some of the more serious problems it may be necessary to carry out additional measurements or structure refinements. However, the purpose of your study may justify the reported deviations and the more serious of these should normally be commented upon in the discussion or experimental section of a paper or in the "special\_details" fields of the CIF. checkCIF was carefully designed to identify outliers and unusual parameters, but every test has its limitations and alerts that are not important in a particular case may appear. Conversely, the absence of alerts does not guarantee there are no aspects of the results needing attention. It is up to the individual to critically assess their own results and, if necessary, seek expert advice.

### Publication of your CIF in IUCr journals

A basic structural check has been run on your CIF. These basic checks will be run on all CIFs submitted for publication in IUCr journals (*Acta Crystallographica*, *Journal of Applied Crystallography*, *Journal of Synchrotron Radiation*); however, if you intend to submit to *Acta Crystallographica Section C* or *E* or *IUCrData*, you should make sure that full publication checks are run on the final version of your CIF prior to submission.

### Publication of your CIF in other journals

Please refer to the *Notes for Authors* of the relevant journal for any special instructions relating to CIF submission.

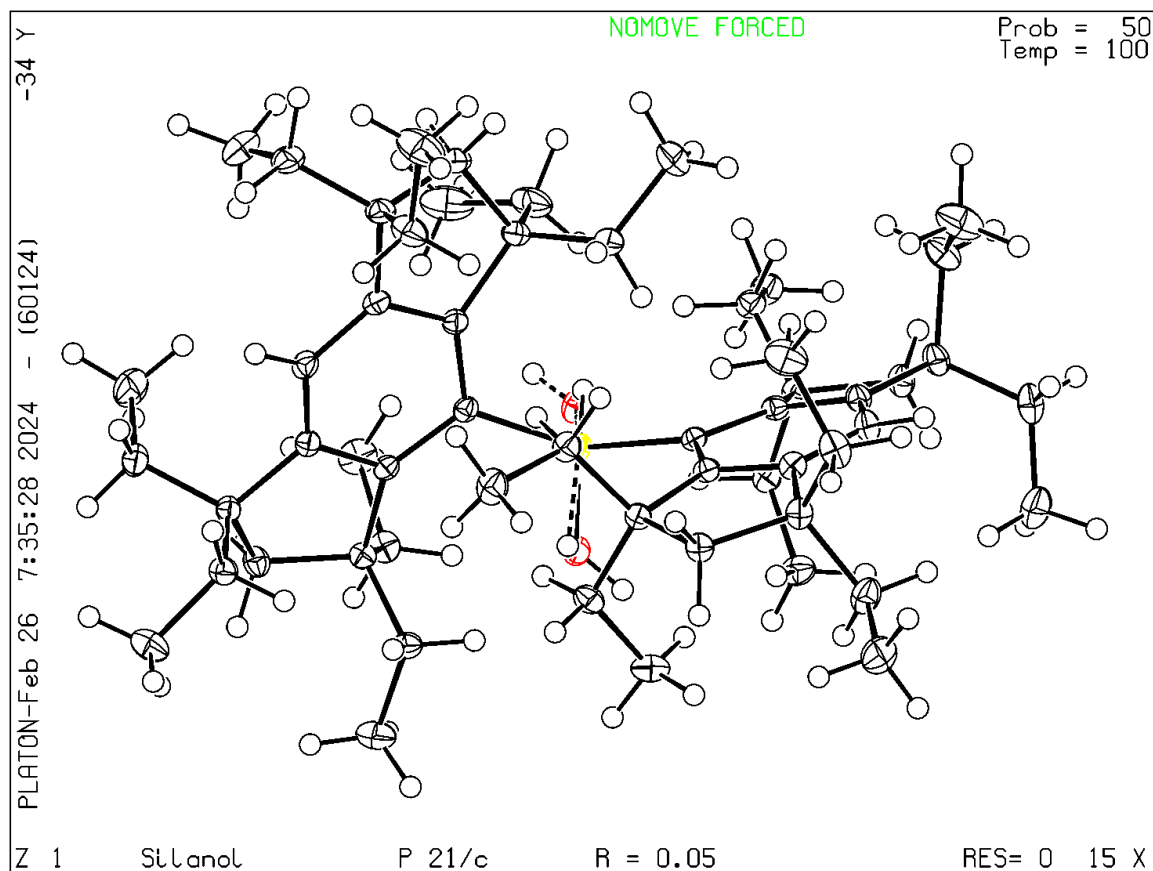

Supplement: Supplementary file 2 [file supplementary]
