# Supplementary material for: Approach to the “Missing” Diarylsilylene: Formation, Characterization, and Intramolecular C−H Bond Activation of Blue Diarylsilylenes Having Bulky Rind Groups
Source: Preprints.org preprint supplement (doi:10.20944/preprints202403.0372.v1), 2024-03-06

## checkCIF/PLATON report

Structure factors have been supplied for datablock(s) Eind-Silylene

THIS REPORT IS FOR GUIDANCE ONLY. IF USED AS PART OF A REVIEW PROCEDURE FOR PUBLICATION, IT SHOULD NOT REPLACE THE EXPERTISE OF AN EXPERIENCED CRYSTALLOGRAPHIC REFEREE.

No syntax errors found. CIF dictionary Interpreting this report

## Datablock: Eind-Silylene

|                 |                |                    |              |
|-----------------|----------------|--------------------|--------------|
| Bond precision: | C-C = 0.0032 Å | Wavelength=0.71073 |              |
| Cell:           | a=32.720 (7)   | b=18.594 (4)       | c=16.662 (4) |
|                 | alpha=90       | beta=104.756 (3)   | gamma=90     |
| Temperature:    | 100 K          |                    |              |

|                        | Calculated   | Reported     |
|------------------------|--------------|--------------|
| Volume                 | 9803(4)      | 9803(4)      |
| Space group            | C 2/c        | C 2/c        |
| Hall group             | -C 2yc       | -C 2yc       |
| Moiety formula         | C56 H90 Si   | C56 H90 Si   |
| Sum formula            | C56 H90 Si   | C56 H90 Si   |
| Mr                     | 791.37       | 791.36       |
| Dx, g cm <sup>-3</sup> | 1.072        | 1.072        |
| Z                      | 8            | 8            |
| Mu (mm <sup>-1</sup> ) | 0.082        | 0.082        |
| F000                   | 3520.0       | 3520.0       |
| F000'                  | 3521.72      |              |
| h, k, lmax             | 42, 24, 21   | 42, 24, 21   |
| Nref                   | 11268        | 11249        |
| Tmin, Tmax             | 0.982, 0.991 | 0.981, 0.993 |
| Tmin'                  | 0.977        |              |

```
Correction method= # Reported T Limits: Tmin=0.981 Tmax=0.993
AbsCorr = NUMERICAL
```

Data completeness= 0.998                      Theta (max)= 27.500

```
R(reflections)= 0.0757( 8955)      wR2(reflections)=
S = 1.098                          0.1823( 11249)
Npar= 540
```

---

The following ALERTS were generated. Each ALERT has the format

**test-name\_ALERT\_alert-type\_alert-level.**

Click on the hyperlinks for more details of the test.

---

### Alert level B

PLAT094\_ALERT\_2\_B Ratio of Maximum / Minimum Residual Density .... 5.12 Report

**Author Response: The crystal may contain a trace amount of water molecules that interact with the silylene moiety but this was not implemented in the refinement model due to a lack of crucial evidence for its presence.**

PLAT097\_ALERT\_2\_B Large Reported Max. (Positive) Residual Density 1.71 eA-3

**Author Response: The crystal may contain a trace amount of water molecules that interact with the silylene moiety but this was not implemented in the refinement model due to a lack of crucial evidence for its presence.**

---

### Alert level C

DIFMX02\_ALERT\_1\_C The maximum difference density is > 0.1\*ZMAX\*0.75

The relevant atom site should be identified.

|                   |                                           |        |                     |         |         |              |
|-------------------|-------------------------------------------|--------|---------------------|---------|---------|--------------|
| PLAT222_ALERT_3_C | NonSolvent Resd 1                         | H      | Uiso(max)/Uiso(min) | Range   | 5.1     | Ratio        |
| PLAT420_ALERT_2_C | D-H Bond Without Acceptor                 | Si1A   | --H1                | .       |         | Please Check |
| PLAT906_ALERT_3_C | Large K Value in the Analysis of Variance | .....  |                     |         | 15.204  | Check        |
| PLAT906_ALERT_3_C | Large K Value in the Analysis of Variance | .....  |                     |         | 2.480   | Check        |
| PLAT911_ALERT_3_C | Missing FCF Refl Between Thmin & STh/L=   | 0.600  |                     |         | 13      | Report       |
|                   | 0 2 0,                                    | 2 2 0, | 3 1 0,              | 4 0 0,  | -3 1 1, | 0 2 1,       |
|                   | 1 1 1,                                    | 2 2 1, | -2 0 2,             | -1 1 2, | -1 3 3, | 9 19 3,      |
|                   | -20 4 5,                                  |        |                     |         |         |              |

---

### Alert level G

|                   |                                                  |        |           |
|-------------------|--------------------------------------------------|--------|-----------|
| PLAT002_ALERT_2_G | Number of Distance or Angle Restraints on AtSite | 9      | Note      |
| PLAT066_ALERT_1_G | Predicted and Reported Tmin&Tmax Range Identical | ?      | Check     |
| PLAT083_ALERT_2_G | SHELXL Second Parameter in WGHT Unusually Large  | 14.28  | Why ?     |
| PLAT128_ALERT_4_G | Alternate Setting for Input Space Group          | C2/c   | I2/a Note |
| PLAT171_ALERT_4_G | The CIF-Embedded .res File Contains EADP Records | 5      | Report    |
| PLAT172_ALERT_4_G | The CIF-Embedded .res File Contains DFIX Records | 2      | Report    |
| PLAT173_ALERT_4_G | The CIF-Embedded .res File Contains DANG Records | 2      | Report    |
| PLAT176_ALERT_4_G | The CIF-Embedded .res File Contains SADI Records | 3      | Report    |
| PLAT191_ALERT_3_G | A Non-default SADI Restraint Value has been used | 0.0020 | Report    |
| PLAT191_ALERT_3_G | A Non-default SADI Restraint Value has been used | 0.0020 | Report    |
| PLAT191_ALERT_3_G | A Non-default SADI Restraint Value has been used | 0.0020 | Report    |
| PLAT301_ALERT_3_G | Main Residue Disorder ..... (Resd 1)             | 9%     | Note      |
| PLAT410_ALERT_2_G | Short Intra H...H Contact H1 ..H13B .            | 2.10   | Ang.      |
|                   | x,y,z =                                          | 1_555  | Check     |
| PLAT410_ALERT_2_G | Short Intra H...H Contact H1 ..H15B .            | 1.96   | Ang.      |
|                   | x,y,z =                                          | 1_555  | Check     |
| PLAT410_ALERT_2_G | Short Intra H...H Contact H25A ..H55A .          | 1.87   | Ang.      |
|                   | x,y,z =                                          | 1_555  | Check     |

|                   |                                                            |      |               |   |             |
|-------------------|------------------------------------------------------------|------|---------------|---|-------------|
| PLAT410_ALERT_2_G | Short Intra H...H Contact                                  | H32B | ..H47C        | . | 1.93 Ang.   |
|                   |                                                            |      | x,y,z =       |   | 1_555 Check |
| PLAT410_ALERT_2_G | Short Intra H...H Contact                                  | H32B | ..H47D        | . | 2.12 Ang.   |
|                   |                                                            |      | x,y,z =       |   | 1_555 Check |
| PLAT410_ALERT_2_G | Short Intra H...H Contact                                  | H43B | ..H47D        | . | 2.11 Ang.   |
|                   |                                                            |      | x,y,z =       |   | 1_555 Check |
| PLAT412_ALERT_2_G | Short Intra XH3 .. XHn                                     | H46C | ..H47B        | . | 2.10 Ang.   |
|                   |                                                            |      | x,y,z =       |   | 1_555 Check |
| PLAT413_ALERT_2_G | Short Inter XH3 .. XHn                                     | H26A | ..H56F        | . | 2.14 Ang.   |
|                   |                                                            |      | 1-x,y,1/2-z = |   | 2_655 Check |
| PLAT860_ALERT_3_G | Number of Least-Squares Restraints .....                   |      |               |   | 7 Note      |
| PLAT910_ALERT_3_G | Missing # of FCF Reflection(s) Below Theta(Min).           |      |               |   | 2 Note      |
|                   | 1 1 0, 2 0 0,                                              |      |               |   |             |
| PLAT912_ALERT_4_G | Missing # of FCF Reflections Above STh/L= 0.600            |      |               |   | 3 Note      |
| PLAT913_ALERT_3_G | Missing # of Very Strong Reflections in FCF ....           |      |               |   | 3 Note      |
|                   | 0 2 0, -3 1 1, -1 3 3,                                     |      |               |   |             |
| PLAT933_ALERT_2_G | Number of HKL-OMIT Records in Embedded .res File           |      |               |   | 2 Note      |
|                   | 0 2 0, -2 0 2,                                             |      |               |   |             |
| PLAT941_ALERT_3_G | Average HKL Measurement Multiplicity .....                 |      |               |   | 3.6 Low     |
| PLAT967_ALERT_5_G | Note: Two-Theta Cutoff Value in Embedded .res ..           |      |               |   | 55.0 Degree |
| PLAT969_ALERT_5_G | The 'Henn et al.' R-Factor-gap value .....                 |      |               |   | 4.15 Note   |
|                   | Predicted wR2: Based on SigI**2 4.40 or SHELX Weight 17.01 |      |               |   |             |
| PLAT978_ALERT_2_G | Number C-C Bonds with Positive Residual Density.           |      |               |   | 6 Info      |

---

0 **ALERT level A** = Most likely a serious problem - resolve or explain  
 2 **ALERT level B** = A potentially serious problem, consider carefully  
 6 **ALERT level C** = Check. Ensure it is not caused by an omission or oversight  
 29 **ALERT level G** = General information/check it is not something unexpected

2 ALERT type 1 CIF construction/syntax error, inconsistent or missing data  
 15 ALERT type 2 Indicator that the structure model may be wrong or deficient  
 12 ALERT type 3 Indicator that the structure quality may be low  
 6 ALERT type 4 Improvement, methodology, query or suggestion  
 2 ALERT type 5 Informative message, check

---



---

It is advisable to attempt to resolve as many as possible of the alerts in all categories. Often the minor alerts point to easily fixed oversights, errors and omissions in your CIF or refinement strategy, so attention to these fine details can be worthwhile. In order to resolve some of the more serious problems it may be necessary to carry out additional measurements or structure refinements. However, the purpose of your study may justify the reported deviations and the more serious of these should normally be commented upon in the discussion or experimental section of a paper or in the "special\_details" fields of the CIF. checkCIF was carefully designed to identify outliers and unusual parameters, but every test has its limitations and alerts that are not important in a particular case may appear. Conversely, the absence of alerts does not guarantee there are no aspects of the results needing attention. It is up to the individual to critically assess their own results and, if necessary, seek expert advice.

### **Publication of your CIF in IUCr journals**

A basic structural check has been run on your CIF. These basic checks will be run on all CIFs submitted for publication in IUCr journals (*Acta Crystallographica*, *Journal of Applied Crystallography*, *Journal of Synchrotron Radiation*); however, if you intend to submit to *Acta Crystallographica Section C* or *E* or *IUCrData*, you should make sure that full publication checks are run on the final version of your CIF prior to submission.

### **Publication of your CIF in other journals**

Please refer to the *Notes for Authors* of the relevant journal for any special instructions relating to CIF submission.

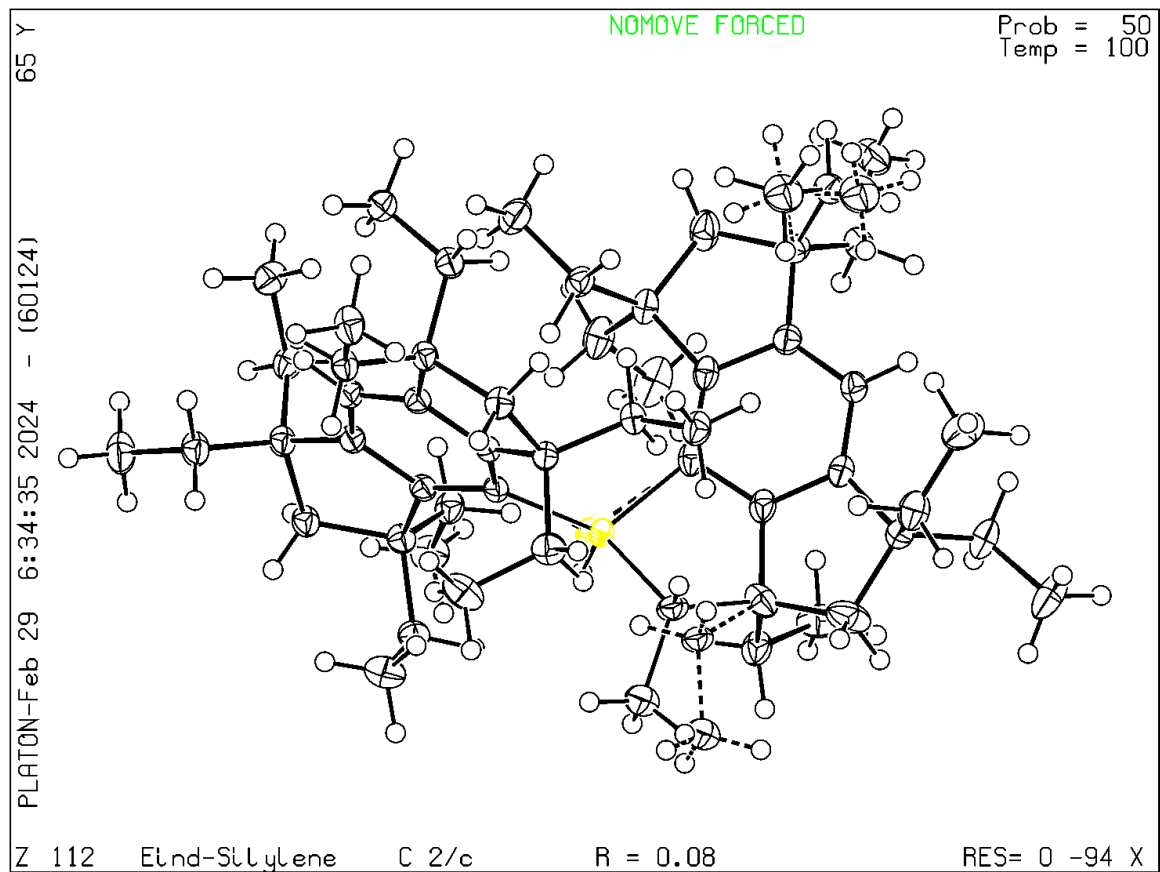

Supplement: Supplementary file 1 [file supplementary]
